# Supplementary material for: Botulism in Spain: Epidemiology and Outcomes of Antitoxin Treatment, 1997–2019
Source: MDPI journal article supplement (doi:10.3390/toxins15010002), 2022-12-20
Supplement: s1 [file s1]

## Supplementary Materials:

**Table S1.** Characteristics of food-borne botulism outbreaks in Spain 1997–2019, including information on the setting, number of cases involved, detection of the toxin in clinical and food samples, food involved and its trade distribution.

| Outbreak | Year | Setting    | N of Cases | Positive Result in Clinical Samples (Type) | Food                                | Distribution           | Positive Result on Food (Type) |
|----------|------|------------|------------|--------------------------------------------|-------------------------------------|------------------------|--------------------------------|
| 1        | 1997 | Home       | 2          | Yes (B)                                    | Green peas                          | Homemade preserved     | N/A                            |
| 2        | 1998 | Home       | 2          | No                                         | Vegetables                          | Homemade preserved     | N/A                            |
| 3        | 1998 | Home       | 3          | Yes (B)                                    | Cured (Serrano) ham                 | Homemade preserved     | Yes (B)                        |
| 4        | 1998 | Restaurant | 7          | Yes                                        | Vegetables                          | Large-scale food trade | N/A                            |
| 5        | 1999 | Home       | 2          | No                                         | Asparagus                           | Homemade preserved     | No                             |
| 6        | 1999 | Home       | 2          | No                                         | Mushrooms                           | Homemade preserved     | N/A                            |
| 7        | 2001 | Home       | 2          | No                                         | Green beans                         | Homemade preserved     | No                             |
| 8        | 2001 | Home       | 4          | No                                         | Green beans                         | Homemade preserved     | No                             |
| 9        | 2001 | Restaurant | 2          | No                                         | Mixed                               | Large-scale food trade | N/A                            |
| 10       | 2002 |            | 2          | Yes                                        | Chilli peppers                      | Homemade preserved     | Yes                            |
| 11       | 2002 |            | 1*         | No                                         |                                     |                        | N/A                            |
| 12       | 2003 | Home       | 2          | Yes                                        | Mixed                               | Homemade preserved     | N/A                            |
| 13       | 2004 | Home       | 2          | No                                         | Green beans                         | Homemade preserved     | No                             |
| 14       | 2005 | Home       | 3          | Yes                                        | Olives                              | Homemade preserved     | Yes                            |
| 15       | 2005 |            | 5          | Yes                                        | Cured meat                          | Large-scale food trade | Yes                            |
| 16       | 2005 | Home       | 2          | No                                         | Vegetables                          | Homemade preserved     | No                             |
| 17       | 2005 | Home       | 4          | No                                         | Chilli peppers                      | Homemade preserved     | No                             |
| 18       | 2007 | Home       | 2          | No                                         | Artichokes                          | Large-scale food trade | Yes                            |
| 19       | 2007 | Home       | 2          | No                                         | Vegetables                          | Homemade preserved     | N/A                            |
| 20       | 2008 | Home       | 2          | Yes                                        | Tuna                                | Homemade preserved     | Yes                            |
| 21       | 2009 | Home       | 2          | Yes                                        | Vegetables                          | Large-scale food trade | N/A                            |
| 22       | 2009 | Canteen    | 2          | No                                         | Chilli peppers                      | Homemade preserved     | Yes                            |
| 23       | 2010 | Home       | 4          | Yes                                        | Fried tomato                        | Homemade preserved     | N/A                            |
| 24       | 2011 | Home       | 2          | No                                         | Roasted peppers                     | Homemade preserved     | Yes (A)                        |
| 25       | 2011 | Home       | 2          | Yes (B)                                    |                                     | Homemade preserved     | No                             |
| 26       | 2011 |            | 2          | Yes (A)                                    |                                     |                        | N/A                            |
| 27       | 2011 |            | 2          | Yes                                        | Paté “micuit”                       | Homemade preserved     | N/A                            |
| 28       | 2011 | Home       | 5          | Yes (F)                                    | Mixed                               |                        | N/A                            |
| 29       | 2012 | Home       | 2          | No                                         | Chilli pepper                       | Small-scale food trade | No                             |
| 30       | 2012 | Home       | 2          | Yes (B)                                    | Leek                                | Homemade preserved     | Yes (B)                        |
| 31       | 2012 | Home       | 2          | No                                         | Pear                                | Homemade preserved     | N/A                            |
| 32       | 2013 | Home       | 2          | No                                         | Mushrooms                           | Homemade preserved     | Yes                            |
| 33       | 2013 |            | 2          | Yes (B)                                    |                                     |                        | N/A                            |
| 34       | 2014 | Home       | 2          | Yes (B)                                    | Vegetables                          | Homemade preserved     | N/A                            |
| 35       | 2014 | Home       | 3          | No                                         | Green beans                         | Homemade preserved     | Yes                            |
| 36       | 2014 | Home       | 3          | No                                         | Beans                               | Homemade preserved     | Yes                            |
| 37       | 2016 | Home       | 2          | No                                         | Salted and dried roach <sup>Δ</sup> | Large-scale food trade | Yes (E)                        |
| 38       | 2016 | Canteen    | 2          | Yes                                        | Beans                               | Large-scale food trade | Yes                            |
| 39       | 2017 |            | 2          | Yes (B)                                    |                                     |                        | N/A                            |
| 40       | 2017 | Home       | 2          | Yes                                        | Mixed                               |                        | N/A                            |
| 41       | 2018 | Home       | 4          | Yes                                        | Beans & carrots                     | Homemade preserved     | Yes                            |
| 42       | 2018 | Home       | 2          | No                                         | Vegetables                          | Homemade preserved     | N/A                            |

|    |      |      |   |    |      |                        |     |
|----|------|------|---|----|------|------------------------|-----|
| 43 | 2019 | Home | 4 | No | Tuna | Large-scale food trade | Yes |
| 44 | 2019 | Home | 7 | No | Tuna | Homemade preserved     | Yes |

N/A: Not analyzed. \* Another case was related but symptoms were so soft that hospitalization was not necessary, no samples were taken and no survey was made so it was excluded for the analysis.  $\Delta$  *C. butyricum* detected in food.

**Table S2.** Patients with acute adverse events that could be related to botulism antitoxin administration, in Spain 1997–2019.

| Year | Sex    | Age | Adverse Drug Reaction                               | Patient's Global Severity |
|------|--------|-----|-----------------------------------------------------|---------------------------|
| 2008 | Male   | 72  | Anaphylaxis                                         | Yes                       |
| 2009 | Male   | 58  | Iatrogenic hypotension                              | No                        |
| 2013 | Male   | 67  | Unknown but reflected in the epidemiological survey | Yes                       |
| 2013 | Female | 58  | Anaphylaxis and iatrogenic hypotension              | Yes                       |

**Table S3.** Main characteristics related to toxin detected, antitoxin treatment and length of hospitalization in infant botulisms in Spain 1997–2019.

| Year | Sex    | Age (Months) | Case Classification | Toxin Type <sup>†</sup> | Antitoxin | Length of Hospitalization (Days) |
|------|--------|--------------|---------------------|-------------------------|-----------|----------------------------------|
| 1997 | male   | 1            | Confirmed           | B                       | No        | 33                               |
| 1997 | female | 1            | Possible            |                         | No        | 41                               |
| 1998 | male   | 2            | Probable            | B (in honey)            | No        | 27                               |
| 1999 | male   |              | Possible            |                         | No        |                                  |
| 2000 | male   | 2            | Confirmed           | B                       | No        | 39                               |
| 2007 | female | 4            | Confirmed           | Not specified           | No        | 22                               |
| 2007 | female | 2            | Confirmed           | Not specified           | Baby-BIG  | 26                               |
| 2007 | female | 1            | Confirmed           | Not specified           | Baby-BIG  | 33                               |
| 2008 | female | 1            | Confirmed           | Not specified           | No        | 15                               |
| 2008 | female | 1            | Confirmed           | Not specified           |           | 23                               |
| 2009 | male   | 10           | Confirmed           | Not specified           |           | 15                               |
| 2010 | male   | 7            | Confirmed           | B                       |           | 19                               |
| 2010 | male   | 5            | Confirmed           | Not specified           | No        | 1                                |
| 2010 | male   | 1            | Confirmed           | Not specified           |           | 13                               |
| 2011 | female | 1            | Confirmed           | Not specified           |           | 19                               |
| 2011 | female | 3            | Confirmed           | B                       | Baby-BIG  | 24                               |
| 2012 | female | 0            | Confirmed           | Not specified           |           | 33                               |
| 2016 | male   | 9            | Possible            |                         | BAT       | 29                               |
| 2016 | male   | 5            | Confirmed           | B                       |           | 5                                |
| 2016 | male   | 6            | Confirmed           | B                       |           | 15                               |
| 2017 | female | 4            | Confirmed           | B                       | Baby-BIG  |                                  |
| 2017 | female | 6            | Confirmed           | B                       | Baby-BIG  | 34                               |
| 2018 | male   | 6            | Confirmed           | B                       | No        | 14                               |
| 2019 | male   | 3            | Confirmed           | B                       | BAT       | 15                               |
| 2019 | female | 1            | Confirmed           | B                       | No        | 10                               |
| 2019 | male   | 8            | Confirmed           | B                       |           | 20                               |
| 2019 | male   | 2            | Confirmed           | Not specified           | No        | 13                               |
| 2019 | male   | 5            | Possible            |                         | No        | 13                               |

<sup>†</sup> Toxin type detection was performed by PCR method and it could not be specified when the only available sample was serum.
